# Supplementary material for: Amelioration of Brain Damage after Treatment with the Methanolic Extract of Glycyrrhizae Radix et Rhizoma in Mice
Source: MDPI journal article supplement (doi:10.3390/pharmaceutics14122776), 2022-12-12
Supplement: s1 [file s1]

Table S3. The frequency degree with which disease is connected to compounds in target-disease network.

| Disease                               | Degree | Disease                                                                     | Degree |
|---------------------------------------|--------|-----------------------------------------------------------------------------|--------|
| Breast cancer                         | 68     | Pain, unspecified                                                           | 64     |
| Cancer, unspecific                    | 67     | Pathological angiogenesis                                                   | 64     |
| Alzheimer's Disease                   | 66     | Peutz-Jeghers syndrome                                                      | 64     |
| Cardiovascular disease, unspecified   | 66     | Pyresis                                                                     | 64     |
| Myocardial Infarction                 | 66     | Stroke                                                                      | 64     |
| Prostate cancer                       | 66     | Vascular lesion regression                                                  | 64     |
| Bladder cancer                        | 65     | Cardiovascular disease                                                      | 63     |
| Inflammation                          | 65     | Endocrine independent cancer                                                | 63     |
| Renal Cell Carcinoma                  | 65     | Migraine                                                                    | 63     |
| Rheumatoid arthritis, unspecified     | 65     | Osteoporosis                                                                | 63     |
| Abdominal aortic aneurysm             | 64     | Osteoporosis, unspecified                                                   | 63     |
| Adenomatous polyposis                 | 64     | Postmenopausal symptoms                                                     | 63     |
| Analgesics                            | 64     | Solid tumors                                                                | 61     |
| Arthritis                             | 64     | Multiple Myeloma                                                            | 59     |
| Brain injury                          | 64     | Non-small Cell Lung Cancer                                                  | 59     |
| Carcinoma in situ, unspecified        | 64     | Thrombosis                                                                  | 58     |
| Carpal tunnel syndrome                | 64     | Chronic inflammatory diseases                                               | 57     |
| Colorectal cancer                     | 64     | Ischemia reperfusion injuries                                               | 55     |
| Coronary atherosclerosis              | 64     | Asthma                                                                      | 54     |
| Dysmenorrhea, unspecified             | 64     | Multiple Sclerosis                                                          | 54     |
| Endometriosis                         | 64     | Androgen insensitivity                                                      | 53     |
| Genitourinary tumors                  | 64     | Hypospadias 1, X-linked                                                     | 53     |
| Gestational hypertension              | 64     | Spinal and bulbar muscular atrophy                                          | 53     |
| Inflammatory diseases                 | 64     | Spinal and bulbar muscular atrophy of Kennedy                               | 53     |
| Lung Cancer                           | 64     | XY disorders of sex development (Disorders in androgen synthesis or action) | 53     |
| Malignant mesothelioma                | 64     | XY disorders of sex development (Other)                                     | 53     |
| Meningioma                            | 64     | Autoimmune Diseases                                                         | 52     |
| Neurodegenerative diseases            | 64     | Diabetes mellitus                                                           | 52     |
| Oropharyngeal squamous cell carcinoma | 64     | Noninsulin-dependent diabetes mellitus                                      | 52     |
| Osteoarthritis                        | 64     | Obesity                                                                     | 52     |

| Disease                                                 | Degree | Disease                                            | Degree |
|---------------------------------------------------------|--------|----------------------------------------------------|--------|
| Crohn's Disease, unspecified                            | 50     | B-cell malignancies                                | 45     |
| Insulin resistance                                      | 50     | Chronic lymphocytic leukemia (CLL)                 | 45     |
| Psoriasis                                               | 50     | Hepatocellular Carcinoma (HCC)                     | 45     |
| Adrenocorticotrophic hormone-secreting pituitary tumors | 49     | Nasopharyngeal Cancer (NPC)                        | 45     |
| Atherosclerosis                                         | 49     | Non-Hodgkin's Lymphoma                             | 45     |
| Atopic Dermatitis                                       | 49     | Viral infection, unspecified                       | 45     |
| Coagulative disorders                                   | 49     | Atrial fibrillation and flutter                    | 43     |
| Inflammatory Bowel Disease                              | 49     | Thromboembolism                                    | 43     |
| Ischemic heart disease                                  | 49     | Skin diseases                                      | 41     |
| Pancreatic Cancer                                       | 49     | Adult respiratory distress syndrome                | 40     |
| Testicular cancer                                       | 49     | Cardiac dysrhythmias                               | 40     |
| Thromboembolic disorders                                | 49     | Crescentic glomerulonephritis                      | 40     |
| Thrombotic disease                                      | 49     | Cytokine-mediated diseases                         | 40     |
| Thyroid follicular carcinoma                            | 49     | Endotoxemia                                        | 40     |
| Ulcerative colitis                                      | 49     | Epileptic seizures                                 | 40     |
| Chronic Myelogenous Leukemia (CML)                      | 48     | Pain                                               | 40     |
| ER beta-positive prostate tumors                        | 48     | Refractory partial epilepsy                        | 40     |
| Gastrointestinal Stromal Tumors (GIST)                  | 48     | Sustained ventricular tachycardia                  | 40     |
| Hematological Malignancies                              | 48     | Cardiac arrhythmias                                | 34     |
| HER2-positive Metastatic Breast Cancer                  | 48     | Glaucoma                                           | 27     |
| Melanoma                                                | 48     | Malignancies                                       | 27     |
| Ovarian cancer                                          | 48     | Anxiety disorder, unspecified                      | 26     |
| Refractory Hematological Malignancies                   | 48     | Chronic obstructive pulmonary disease, unspecified | 26     |
| Vascular injury response                                | 48     | Depression                                         | 26     |
| Ischemia                                                | 47     | Gliomas                                            | 26     |
| Bipolar Affective Disorder                              | 46     | Heparin-induced thrombocytopenia type II           | 26     |
| Immunodeficiency                                        | 46     | Multiple organ failure                             | 26     |
| Acute lymphoblastic leukemia (ALL)                      | 45     | Obstructive airway disease                         | 26     |
| Acute myeloid leukemia (AML)                            | 45     | Respiratory distress syndrome                      | 26     |
| Advanced solid tumors                                   | 45     | Skeletal muscle wasting                            | 26     |

| Disease                          | Degree | Disease                                  | Degree |
|----------------------------------|--------|------------------------------------------|--------|
| Skeletal muscle weakness         | 26     | Airway hyperreactivity                   | 7      |
| Bacterial Infections             | 25     | Neurological diseases                    | 7      |
| Hypertension                     | 25     | Urge incontinence                        | 7      |
| Parkinson's disease              | 24     | Major Depressive Disorder                | 6      |
| Cognitive deficits               | 23     | Cancers                                  | 4      |
| Acute promyelocytic leukemia     | 22     | Cough                                    | 4      |
| Fungal diseases                  | 22     | Diarrhea                                 | 4      |
| Herpes virus infection           | 22     | Dyspnea                                  | 4      |
| Leishmania Infections            | 22     | Opioid-induced bowel dysfunction         | 4      |
| Malaria                          | 22     | Anxiety Disorders                        | 3      |
| Trichomoniasis                   | 22     | Benign prostate hyperplasia              | 3      |
| Schizophrenia                    | 21     | Drug dependence                          | 3      |
| Shy-Drager syndrome              | 20     | Hypertrophic vascular disease            | 3      |
| Blood group, Yt system           | 16     | Insomnia                                 | 3      |
| Hypoxic-ischemic encephalopathy  | 16     | Neuropsychiatric disorders               | 3      |
| Motor neurone disease            | 16     | Opioid dependence                        | 3      |
| Parkinson Disease                | 15     | Renal failure                            | 3      |
| Angiogenesis                     | 14     | Acute ureteric colic                     | 2      |
| Bronchial asthma                 | 13     | Arterial embolism and thrombosis         | 2      |
| Bronchospasm (histamine induced) | 13     | Chemotherapy-induced nausea and vomiting | 2      |
| Chronic myeloid leukemia         | 13     | Cocaine dependence                       | 2      |
| Vascular disease                 | 13     | Diabetic nephropathy                     | 2      |
| Angina                           | 10     | Diabetic neuropathy                      | 2      |
| Colon cancer                     | 10     | Essential (primary) hypertension         | 2      |
| Coronary Artery Disease          | 10     | Irritable bowel syndrome                 | 2      |
| Helminth infection               | 10     | Leukemia, Myeloid                        | 2      |
| Hypertension, Angina             | 10     | Manic disorder                           | 2      |
| Sepsis                           | 10     | Neurologic and psychiatric diseases      | 2      |
| Angioedema                       | 9      | Oesophageal cancer                       | 2      |
| Heart Failure                    | 9      | Parkinsonian symptoms                    | 2      |

| Disease                                                                       | Degree | Disease                                            | Degree |
|-------------------------------------------------------------------------------|--------|----------------------------------------------------|--------|
| Postoperative nausea and vomiting                                             | 2      | Insulin-dependent diabetes mellitus                | 1      |
| Allergic airway inflammation                                                  | 1      | Ischemic Stroke                                    | 1      |
| Autoimmune and sudden sensorineural hearing loss                              | 1      | Metabolic Disease                                  | 1      |
| Autoimmune cardiomyopathy                                                     | 1      | Metabolic syndrome X                               | 1      |
| Bronchoconstriction (cold air-induced)                                        | 1      | Neurogenic bladder                                 | 1      |
| Cancer (multidrug resistant)                                                  | 1      | Pancreatic disease                                 | 1      |
| Chronic lymphocytic leukemia                                                  | 1      | Proliferative diseases                             | 1      |
| Coronary heart disease                                                        | 1      | Prostate cancer (hormone refractory)               | 1      |
| Dilated cardiomyopathy                                                        | 1      | Pseudohypoaldosteronism type I, autosomal dominant | 1      |
| Hyperkalemic distal renal tubular acidosis (RTA type 4)                       | 1      | Rheumatoid arthritis                               | 1      |
| Hyperlipidemia                                                                | 1      | Squamous cell carcinoma                            | 1      |
| Hypertension, early-onset, autosomal dominant, with exacerbation in pregnancy | 1      | Tremor, unspecified                                | 1      |
| Hypoglycemia                                                                  | 1      | Waldenstrom's macroglobulinemia                    | 1      |
| Hypothermia                                                                   | 1      |                                                    |        |
