# Supplementary material for: Amelioration of Brain Damage after Treatment with the Methanolic Extract of Glycyrrhizae Radix et Rhizoma in Mice
Source: MDPI journal article supplement (doi:10.3390/pharmaceutics14122776), 2022-12-12
Supplement: s1 [file s1]

Table S2. The frequency degree with which compound is connected to diseases in target-disease network.

| Compound ID | Degree | Compound ID | Degree | Compound ID | Degree |
|-------------|--------|-------------|--------|-------------|--------|
| MOL003896   | 156    | MOL004908   | 116    | MOL004805   | 86     |
| MOL000392   | 141    | MOL004957   | 116    | MOL004855   | 86     |
| MOL005003   | 140    | MOL004810   | 115    | MOL004814   | 85     |
| MOL004959   | 139    | MOL005020   | 114    | MOL004945   | 83     |
| MOL004991   | 137    | MOL004857   | 112    | MOL004829   | 82     |
| MOL000500   | 133    | MOL004864   | 112    | MOL002311   | 80     |
| MOL004974   | 132    | MOL004915   | 112    | MOL004941   | 78     |
| MOL000467   | 131    | MOL005000   | 112    | MOL001484   | 77     |
| MOL000497   | 129    | MOL004856   | 111    | MOL004910   | 75     |
| MOL004978   | 129    | MOL004912   | 111    | MOL000239   | 73     |
| MOL004828   | 128    | MOL004883   | 110    | MOL001792   | 73     |
| MOL004966   | 127    | MOL004820   | 108    | MOL005001   | 72     |
| MOL002565   | 126    | MOL004884   | 106    | MOL004913   | 68     |
| MOL004811   | 126    | MOL005012   | 105    | MOL004989   | 64     |
| MOL004835   | 126    | MOL004815   | 104    | MOL004806   | 57     |
| MOL004891   | 125    | MOL004848   | 104    | MOL004948   | 57     |
| MOL005007   | 122    | MOL004863   | 104    | MOL004988   | 56     |
| MOL004833   | 120    | MOL005016   | 104    | MOL004838   | 55     |
| MOL003656   | 119    | MOL004866   | 103    | MOL005018   | 51     |
| MOL004911   | 118    | MOL004980   | 102    | MOL004882   | 46     |
| MOL004808   | 116    | MOL005017   | 102    | MOL000359   | 6      |
| MOL004849   | 116    | MOL004907   | 101    | MOL000263   | 4      |
| MOL004885   | 116    | MOL004879   | 90     | MOL000211   | 1      |
