# Supplementary material for: Amelioration of Brain Damage after Treatment with the Methanolic Extract of Glycyrrhizae Radix et Rhizoma in Mice
Source: MDPI journal article supplement (doi:10.3390/pharmaceutics14122776), 2022-12-12
Supplement: s1 [file s1]

Table S1. Mol ID, chemical name, and molecular weight of 69 active compounds from Glycyrrhizae Radix et Rhizoma (GR) and their corresponding predicted OB, Caco-2, BBB, and DL scores.

| Mol ID    | Chemical name                                                                                      | MW     | OB (%) | Caco-2 | BBB   | DL   |
|-----------|----------------------------------------------------------------------------------------------------|--------|--------|--------|-------|------|
| MOL000211 | Mairin                                                                                             | 456.78 | 55.38  | 0.73   | 0.22  | 0.78 |
| MOL000239 | Jaranol                                                                                            | 314.31 | 50.83  | 0.61   | −0.22 | 0.29 |
| MOL000263 | Oleanolic acid                                                                                     | 456.78 | 29.02  | 0.59   | 0.07  | 0.76 |
| MOL000359 | Sitosterol                                                                                         | 414.79 | 36.91  | 1.32   | 0.87  | 0.75 |
| MOL000392 | Formononetin                                                                                       | 268.28 | 69.67  | 0.78   | 0.02  | 0.21 |
| MOL000467 | Castanin                                                                                           | 298.31 | 23.54  | 0.77   | −0.1  | 0.27 |
| MOL000497 | Licochalcone a                                                                                     | 338.43 | 40.79  | 0.82   | −0.21 | 0.29 |
| MOL000500 | Vestitol                                                                                           | 272.32 | 74.66  | 0.86   | 0.3   | 0.21 |
| MOL001484 | Inermine                                                                                           | 284.28 | 75.18  | 0.89   | 0.4   | 0.54 |
| MOL001792 | DFV                                                                                                | 256.27 | 32.76  | 0.51   | −0.29 | 0.18 |
| MOL002311 | Glycyrol                                                                                           | 366.39 | 90.78  | 0.71   | −0.2  | 0.67 |
| MOL002565 | Medicarpin                                                                                         | 270.3  | 49.22  | 1      | 0.53  | 0.34 |
| MOL003656 | Lupiwighteone                                                                                      | 338.38 | 51.64  | 0.68   | −0.23 | 0.37 |
| MOL003896 | 7-Methoxy-2-methyl isoflavone                                                                      | 266.31 | 42.56  | 1.16   | 0.56  | 0.2  |
| MOL004805 | (2S)-2-[4-hydroxy-3-(3-methylbut-2-enyl)phenyl]-8,8-dimethyl-2,3-dihydropyrano[2,3-f]chromen-4-one | 390.51 | 31.79  | 1      | 0.25  | 0.72 |
| MOL004806 | Euchrenone                                                                                         | 406.56 | 30.29  | 1.09   | 0.39  | 0.57 |
| MOL004808 | Glyasperin B                                                                                       | 370.43 | 65.22  | 0.47   | −0.09 | 0.44 |
| MOL004810 | Glyasperin F                                                                                       | 354.38 | 75.84  | 0.43   | −0.15 | 0.54 |
| MOL004811 | Glyasperin C                                                                                       | 356.45 | 45.56  | 0.71   | 0.07  | 0.4  |
| MOL004814 | Isotrifoliol                                                                                       | 298.26 | 31.94  | 0.53   | −0.25 | 0.42 |
| MOL004815 | (E)-1-(2,4-dihydroxyphenyl)-3-(2,2-dimethylchromen-6-yl)prop-2-en-1-one                            | 322.38 | 39.62  | 0.66   | −0.12 | 0.35 |
| MOL004820 | Kanzonols W                                                                                        | 336.36 | 50.48  | 0.63   | 0.04  | 0.52 |
| MOL004828 | Glepidotin A                                                                                       | 338.38 | 44.72  | 0.79   | 0.06  | 0.35 |
| MOL004829 | Glepidotin B                                                                                       | 340.4  | 64.46  | 0.46   | −0.09 | 0.34 |
| MOL004833 | Phaseolinisoflavan                                                                                 | 324.4  | 32.01  | 1.01   | 0.46  | 0.45 |
| MOL004835 | Glypallichalcone                                                                                   | 284.33 | 61.6   | 0.76   | 0.23  | 0.19 |
| MOL004838 | 8-(6-hydroxy-2-benzofuranyl)-2,2-dimethyl-5-chromenol                                              | 308.35 | 58.44  | 1      | 0.34  | 0.38 |
| MOL004848 | Licochalcone G                                                                                     | 354.43 | 49.25  | 0.64   | −0.04 | 0.32 |
| MOL004849 | 3-(2,4-dihydroxyphenyl)-8-(1,1-dimethylprop-2-enyl)-7-hydroxy-5-methoxy-coumarin                   | 368.41 | 59.62  | 0.4    | −0.23 | 0.43 |
| MOL004855 | Licoricone                                                                                         | 382.44 | 63.58  | 0.53   | −0.14 | 0.47 |
| MOL004856 | Gancaonin A                                                                                        | 352.41 | 51.08  | 0.8    | 0.13  | 0.4  |
| MOL004857 | Gancaonin B                                                                                        | 368.41 | 48.79  | 0.58   | −0.1  | 0.45 |
| MOL004863 | 3-(3,4-dihydroxyphenyl)-5,7-dihydroxy-8-(3-methylbut-2-enyl)chromone                               | 354.38 | 66.37  | 0.52   | −0.13 | 0.41 |
| MOL004864 | 5,7-dihydroxy-3-(4-methoxyphenyl)-8-(3-                                                            | 352.41 | 30.49  | 0.9    | 0.21  | 0.41 |

|           |                                                                               |        |       |      |       |      |
|-----------|-------------------------------------------------------------------------------|--------|-------|------|-------|------|
|           | methylbut-2-enyl)chromone                                                     |        |       |      |       |      |
| MOL004866 | 2-(3,4-dihydroxyphenyl)-5,7-dihydroxy-6-(3-methylbut-2-enyl)chromone          | 354.38 | 44.15 | 0.48 | −0.28 | 0.41 |
| MOL004879 | Glycyrrin                                                                     | 382.44 | 52.61 | 0.59 | −0.13 | 0.47 |
| MOL004882 | Licocoumarone                                                                 | 340.4  | 33.21 | 0.84 | 0.06  | 0.36 |
| MOL004883 | Licoisoflavone                                                                | 354.38 | 41.61 | 0.37 | −0.27 | 0.42 |
| MOL004884 | Licoisoflavone B                                                              | 352.36 | 38.93 | 0.46 | −0.18 | 0.55 |
| MOL004885 | Licoisoflavanone                                                              | 354.38 | 52.47 | 0.39 | −0.22 | 0.54 |
| MOL004891 | Shinpterocarpin                                                               | 322.38 | 80.3  | 1.1  | 0.68  | 0.73 |
| MOL004907 | Glyzaglabrin                                                                  | 298.26 | 61.07 | 0.34 | −0.2  | 0.35 |
| MOL004908 | Glabridin                                                                     | 324.4  | 53.25 | 0.97 | 0.36  | 0.47 |
| MOL004910 | Glabranin                                                                     | 324.4  | 52.9  | 0.97 | 0.31  | 0.31 |
| MOL004911 | Glabrene                                                                      | 322.38 | 46.27 | 0.99 | 0.04  | 0.44 |
| MOL004912 | Glabrone                                                                      | 336.36 | 52.51 | 0.59 | −0.11 | 0.5  |
| MOL004913 | 1,3-dihydroxy-9-methoxy-6-benzofurano[3,2-c]chromenone                        | 298.26 | 48.14 | 0.48 | −0.19 | 0.43 |
| MOL004915 | Eurycarpin A                                                                  | 338.38 | 43.28 | 0.43 | −0.06 | 0.37 |
| MOL004941 | (2R)-7-hydroxy-2-(4-hydroxyphenyl)chroman-4-one                               | 256.27 | 71.12 | 0.41 | −0.25 | 0.18 |
| MOL004945 | (2S)-7-hydroxy-2-(4-hydroxyphenyl)-8-(3-methylbut-2-enyl)chroman-4-one        | 324.4  | 36.57 | 0.72 | −0.04 | 0.32 |
| MOL004948 | Isoglycyrol                                                                   | 366.39 | 44.7  | 0.91 | 0.05  | 0.84 |
| MOL004957 | HMO                                                                           | 268.28 | 38.37 | 0.79 | 0.25  | 0.21 |
| MOL004959 | 1-Methoxyphaseollidin                                                         | 354.43 | 69.98 | 1.01 | 0.48  | 0.64 |
| MOL004966 | 3'-Hydroxy-4'-O-Methylglabridin                                               | 354.43 | 43.71 | 1    | 0.73  | 0.57 |
| MOL004974 | 3'-Methoxyglabridin                                                           | 354.43 | 46.16 | 0.94 | 0.47  | 0.57 |
| MOL004978 | 2-[(3R)-8,8-dimethyl-3,4-dihydro-2H-pyran-6,5-f]chromen-3-yl]-5-methoxyphenol | 338.43 | 36.21 | 1.12 | 0.61  | 0.52 |
| MOL004980 | Inflacoumarin A                                                               | 322.38 | 39.71 | 0.73 | −0.24 | 0.33 |
| MOL004988 | Kanzonol F                                                                    | 420.54 | 32.47 | 1.18 | 0.56  | 0.89 |
| MOL004989 | 6-prenylated eriodictyol                                                      | 356.4  | 39.22 | 0.4  | −0.29 | 0.41 |
| MOL004991 | 7-Acetoxy-2-methylisoflavone                                                  | 294.32 | 38.92 | 0.74 | 0.16  | 0.26 |
| MOL005000 | Gancaonin G                                                                   | 352.41 | 60.44 | 0.78 | 0.23  | 0.39 |
| MOL005001 | Gancaonin H                                                                   | 420.49 | 50.1  | 0.6  | −0.14 | 0.78 |
| MOL005003 | Licoagrocarpin                                                                | 338.43 | 58.81 | 1.23 | 0.61  | 0.58 |
| MOL005007 | Glyasperins M                                                                 | 368.41 | 72.67 | 0.49 | −0.04 | 0.59 |
| MOL005012 | Licoagroisoflavone                                                            | 336.36 | 57.28 | 0.71 | 0.09  | 0.49 |
| MOL005016 | Odoratin                                                                      | 314.31 | 49.95 | 0.42 | −0.24 | 0.3  |
| MOL005017 | Phaseol                                                                       | 336.36 | 78.77 | 0.76 | −0.06 | 0.58 |
| MOL005018 | Xambioona                                                                     | 388.49 | 54.85 | 1.09 | 0.52  | 0.87 |
| MOL005020 | Dehydroglyasperins C                                                          | 340.4  | 53.82 | 0.68 | −0.12 | 0.37 |
