# Supplementary material for: Amelioration of Brain Damage after Treatment with the Methanolic Extract of Glycyrrhizae Radix et Rhizoma in Mice
Source: Pharmaceutics. 2022 Dec 12;14(12):2776. doi: 10.3390/pharmaceutics14122776 (PMC9781260; doi:10.3390/pharmaceutics14122776)
Supplement: Supplementary file 1 [file pharmaceutics-14-02776-s001.zip]

Archive with 4 entries (4 files):
- Figures S1-S3.pdf
- Table S1.pdf
- Table S2.pdf
- Table S3.pdf
